# Supplementary material
Source: publisher site journal article supplement (https://www.dovepress.com/get_supplementary_file.php?f=418971.docx)
Supplement: Supplementary file 1 [file get_supplementary_file.php]

**Figure S1. Distribution of maintenance therapy in COPD patients. A, permutation and combination of prescription drugs for COPD. B, distribution of prescribed bronchodilators for COPD. C, distribution of any medications suitable for COPD. The cumulative percentage of all types of drugs was calculated.**

**
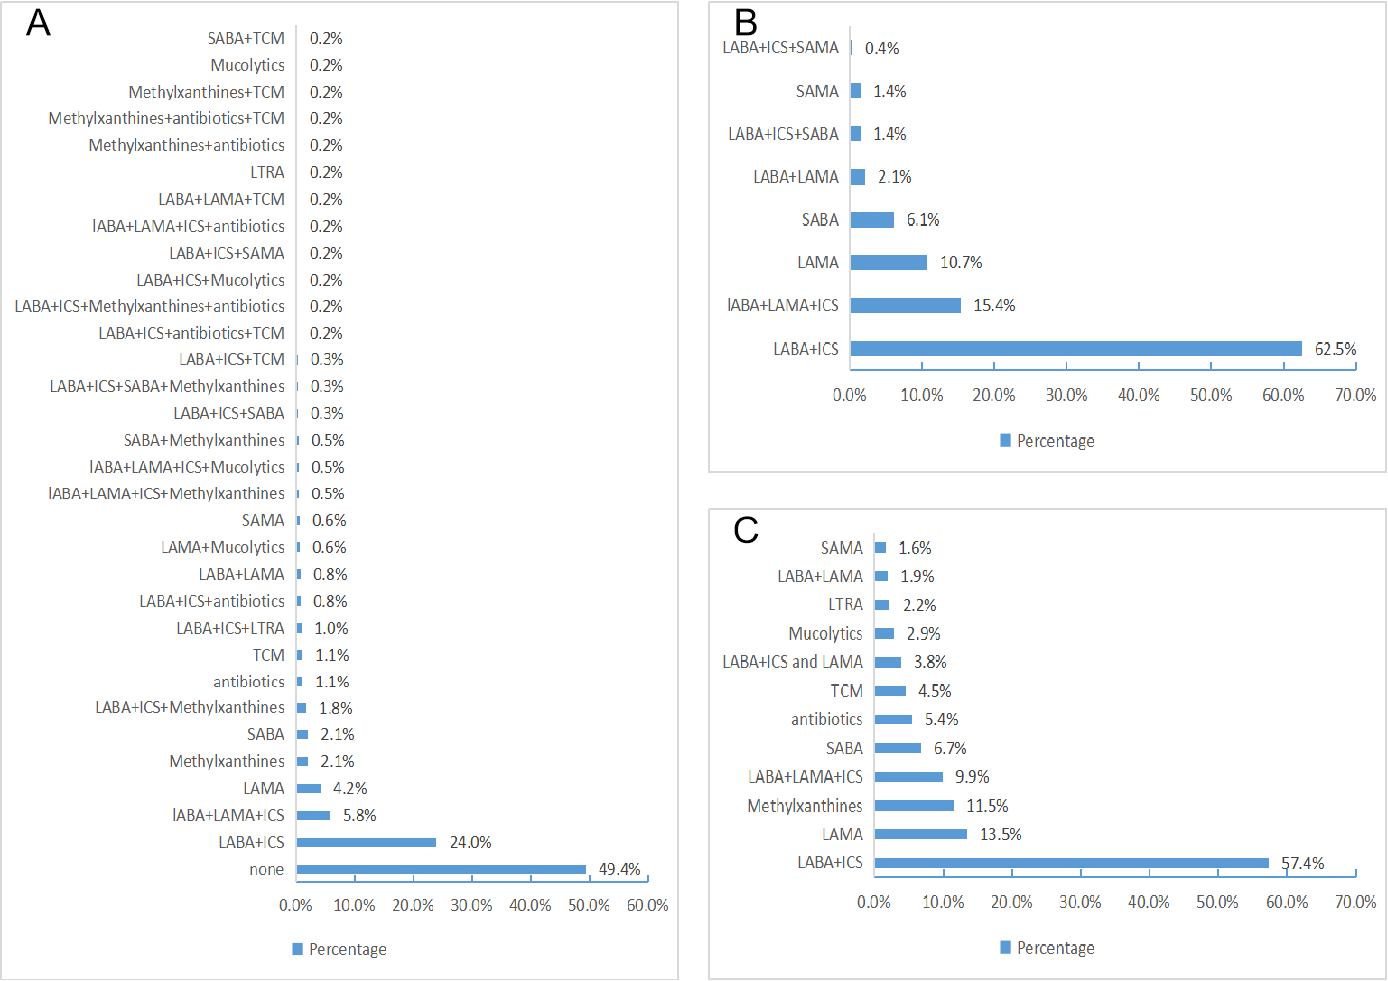
**

ICS, inhaled corticosteroid; LABA, long-acting β2-agonist; LAMA, long-acting antimuscarinic antagonist; SABA, short-acting β2-agonist; SAMA, short-acting muscarinic antagonist; TCM, traditional Chinese medicine, LTRA, leukotriene receptor antagonist

**Table S1 The differences in the treatment recommendations of GOLD groups between GOLD 2017 and GOLD 2023**

|  | Preferred choice | Second-line choice |
| --- | --- | --- |
| 2017 |  |  |
| A | SABA or SAMA(n=6,42.9%) | LABA or LAMA(n=8,57.1%) |
| B | LABA or LAMA(n=13,86.7%) | LABA+LAMA(n=2,13.3%) |
| C | LAMA(n=0, 0%) | LABA+LAMA or LABA+ICS(n=6,100%) |
| D | LABA+LAMA or LAMA(n=10,12.3%) | LABA+LAMA+ICS or LABA+ICS(n=71,87.7%) |
| 2023 |  |  |
| A | LABA or LAMA(n=8,57.1%) | SABA or SAMA(n=6,42.9%) |
| B | LABA+LAMA(n=2,13.3%)* | LABA or LAMA(n=13,86.7%) |
| E | LABA+LAMA(n=3,3.8%) | LABA+LAMA+ICS or LABA+ICS(n=76,96.2%) |

GOLD, Global Initiative for Chronic Obstructive Lung Disease; ICS, inhaled corticosteroid; LABA, long-acting β2-agonist; LAMA, long-acting antimuscarinic agent; SABA, short-acting β2-agonist; SAMA, short-acting muscarinic antagonist.

*, compared with GOLD 2017 Group B, the rate of preferred choices in GOLD 2023 Group B was lower, with statistically significant differences(P<0.05).
